1 Characterization of vertically and cross-species transmitted viruses in the cestode parasite  
2 *Schistocephalus solidus*

3 Megan A Hahn<sup>a</sup>, Karyna Rosario<sup>b</sup>, Pierrick Lucas<sup>c</sup>, Nolwenn M Dheilly<sup>a#</sup>

4

5 <sup>a</sup> *School of Marine and Atmospheric Sciences, Stony Brook University, Stony Brook NY, USA*

6 <sup>b</sup> *College of Marine Science, University of South Florida, Saint Petersburg, FL, USA*

7 <sup>c</sup> *ANSES, Agence Nationale de Sécurité Sanitaire de l'Alimentation, de l'Environnement et du*  
8 *Travail - Laboratoire de Ploufragan-Plouzane, Unité Génétique Virale de Biosécurité,*  
9 *Ploufragan, France*

10

11 # Address correspondence to Nolwenn M Dheilly: [nolwenn.dheilly@stonybrook.edu](mailto:nolwenn.dheilly@stonybrook.edu)

12

13 **Abstract**

14 Parasitic flatworms (Neodermata) represent a public health and economic burden due to associated  
15 debilitating diseases and limited therapeutic treatments available. Despite their importance, there  
16 is scarce information regarding flatworm-associated microbes. We report the discovery of six RNA  
17 viruses in the cestode *Schistocephalus solidus*. None were closely related to classified viruses and  
18 they represent new taxa. Mining transcriptomic data revealed the broad distribution of these  
19 viruses in Alaskan and European *S. solidus* populations. We demonstrate through *in vitro* culture  
20 of *S. solidus* that five of these viruses are vertically transmitted. With experimental infections and  
21 field-sampling, we show that one of the viruses is transmitted to parasitized hosts. The impact of  
22 these viruses in parasite fitness and pathogenicity, and in host-parasite co-evolutionary dynamics  
23 remains to be determined. The detection of six novel viruses in this first characterization of viruses  
24 in Neodermatans likely represents a fraction of virus diversity in parasitic flatworms.

25

26

## 27 **Introduction**

28 Parasitic flatworms (Phylum Platyhelminthes) have long attracted attention for their high  
29 prevalence in humans, livestock, and aquaculture animals, and for causing debilitating diseases.  
30 Trematodes, commonly known as flukes, and cestodes, known as tapeworms, are of particular  
31 interest because around 25-30% of humans alone are currently infected with at least one of these  
32 worm species. Several of the pathologies associated with these parasite infections are considered  
33 major neglected diseases as they affect countries in the Americas, Asia, and Africa (1). The most  
34 notorious example is Schistosomiasis, caused by diverse species of Schistosomes and considered  
35 the second most deadly parasitic disease after malaria (2). The blood fluke *Schistosoma*  
36 *haematobium* and the liver flukes *Opisthorchis viverrini* and *Clonorchis sinensis* are recognized  
37 as group I carcinogens by the International Agency for Research on Cancer (3-5). Fascioliasis,  
38 caused by infection with trematodes from the genus *Fasciola* upon ingestion of contaminated water  
39 plants, has detrimental impacts in humans and economically important livestock including pigs,  
40 cattle, and sheep (6-8). The most well-known cestodes are *Taenia spp.*, *Echinococcus spp.*, and  
41 *Hymenolepis nana*. Infections with cestodes are chronic, can remain asymptomatic for long  
42 periods, and symptoms are often misdiagnosed, making these diseases difficult to target and treat.  
43 Serious effects of parasite infection include cysticercosis and seizures due to *Taenia solium*, cysts  
44 or tumors that grow in the liver, lungs, and other organs with Echinococcosis infection, and  
45 weakness, headaches, anorexia, abdominal pain, and diarrhea associated with Hymenolepiasis (9-  
46 11). Fisheries and, in particular, aquaculture are also largely impacted by parasitic infections due  
47 to the high prevalence and densities of worms in fishes that serve as either intermediate or  
48 definitive hosts (12).

49 Despite their high prevalence and negative impacts, diseases associated with parasitic flatworm  
50 infections are difficult to prevent or treat. The main method of prevention is avoidance, which can  
51 be very difficult in some populations due to limitations in infrastructure and resources (13). Very  
52 few pharmaceutical products are currently available for treatment, with Praziquantel and  
53 Triclabendazole being the most efficient and commonly used. Moreover, instances of parasite  
54 resistance and allergic reactions to these drugs have been reported (14). Thus, researchers have  
55 long sought to understand the underlying molecular mechanisms driving host susceptibility and  
56 parasite pathogenicity in order to develop alternative therapeutic strategies.

57 The application of the concept of “holobiont” to parasites, and the recognition that all organisms  
58 are associated with microbes suggest that microbes, including viruses, could contribute to parasite  
59 pathogenicity (15-18). This realization prompted the launch of the Parasite Microbiome Project  
60 (PMP) (16, 18, 19). Viruses of parasitic flatworms remain largely unknown despite the fact that  
61 viruses infect all cellular life. The first observations of virus-like particles in trematodes were  
62 reported by Jean Lou Justine and its team, studying parasites of mollusks and fishes (20, 21). More  
63 recently, Shi et al. (2016) studied the virome of a broad range of invertebrates using  
64 metatranscriptomics and reported for the first time the complete genomes of a virus of the order  
65 *Bunyavirales* from *Schistosoma japonicum* and of a virus of the family *Nyamiviridae* in the order  
66 *Mononegavirales* from a mix of *Taenia sp.*(22). However, no study to date has specifically focused  
67 on characterizing viruses of a parasitic flatworm.

68 As identified by the PMP consortium, there is a need to characterize the virome of parasitic  
69 organisms to understand the role of parasites in virus evolution and host-microbe interactions,  
70 determine the role of viruses in parasite fitness and host diseases, and identify patterns and  
71 processes of host-parasite-virus coevolution (18). We have previously identified *Schistocephalus*  
72 *solidus* as an ideal parasite to answer these questions (15). *S. solidus* is a cestode with a complex  
73 life cycle in which the definitive hosts are fish-eating birds and intermediate hosts are a range of  
74 cyclopoid copepods and threespine sticklebacks (*Gasterosteus aculeatus*) (23, 24). Since 1946,  
75 methods have been developed to culture *S. solidus in-vitro* (25). Eggs can be conserved in the  
76 fridge for a few years and hatched to collect coracidia that are used to experimentally infect  
77 copepods. Infected copepods are then used to experimentally infect threespine sticklebacks  
78 (hereafter ‘stickleback’) (26). This system has been extensively used to identify the cellular and  
79 molecular mechanisms involved in host resistance and parasite pathogenicity, and to study host-  
80 parasite co-evolution (27, 28). Indeed, these parasites have a broad geographic distribution  
81 throughout the Northern hemisphere that parallels the distribution of its highly specific stickleback  
82 host. Isolated and genetically distinct populations of fish host and parasite are coevolving within  
83 each freshwater lake, providing researchers with an exceptional playground to answer questions  
84 that relate to the ecology and evolution of the host-parasite interaction (29). Finally, the genomes  
85 of both sticklebacks and *S. solidus* have been sequenced, facilitating the use of molecular  
86 approaches (30, 31).

87 The first step to develop the cestode-host-virus system and facilitate studies on the role of viruses  
88 in host-parasite interactions is to characterize viruses associated with *S. solidus*. Herein, we report  
89 the discovery of three new species of negative-strand RNA viruses and three new species of  
90 double-stranded RNA viruses in *S. solidus*. Mining of Transcriptome Sequence Archives (TSA)  
91 and Sequence Read Archives (SRA) data found in GenBank led to the detection of related viral  
92 species in *S. solidus* from another continent suggesting that these viruses are widespread. We then  
93 tested the prevalence and vertical transmission of identified viruses and evaluated the possibility  
94 of cross-species transmission to the hosts through *in vitro* culturing and experimental infections  
95 (Figure 1).

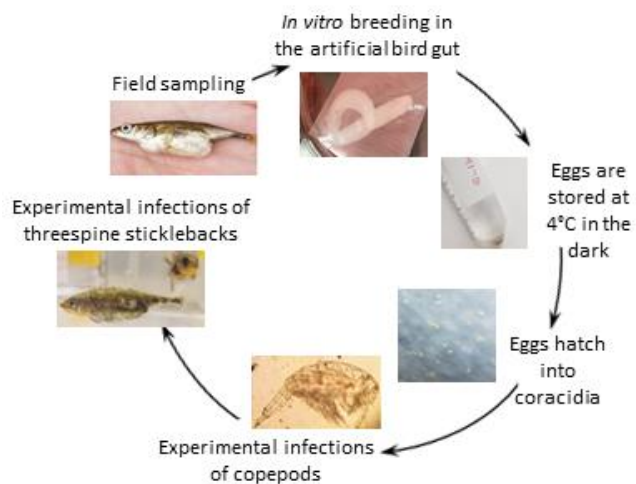

96  
97 **Figure 1: The life cycle of *S. solidus* is reproduced in laboratory conditions to test virus**  
98 **transmission.**

99

## 100 Results

### 101 *Virus discovery*

102 To investigate the presence of viruses in the cestode *S. solidus*, viral particles were purified from  
103 plerocercoids and coracidia and processed for RNA sequencing. The *de novo* assemblies from two  
104 high-throughput sequencing efforts revealed the presence of viral sequences similar to the  
105 unassigned Bat rhabdovirus (AIF74284.1), the chuvirus Hubei myriapoda virus 8  
106 (YP\_009330113.1), the bunya-like Beihai barnacle virus 5 (APG79235.1), and the toti-like dsRNA  
107 viruses Dumyat virus (QAY29251.1) and Hubei toti-like virus 10 (YP\_009336493.1). *De novo*

108 assembled contigs were aligned to these reference virus genomes and completed using targeted  
109 PCR, RACE and Sanger sequencing as needed. BLAST searches against the genome of *S. solidus*  
110 did not yield any matches to these viral sequences, confirming that the identified viruses are not  
111 endogenous viral elements (EVE).

112 The first virus, named Schistocephalus solidus Rhabdovirus (SsRV), contained the five canonical  
113 structure domain genes of viruses from the family *Rhabdoviridae*, order *Mononegavirales* and  
114 showed a maximum of 59% amino acid (aa) identity to the RdRP of unassigned and partially  
115 sequenced Bat Rhabdovirus (AIF4284.1). The SsRV genome encodes for a nucleoprotein (N),  
116 polymerase-associated phosphoprotein (P), matrix protein (M), glycoprotein (G) and RNA-  
117 dependent RNA polymerase (L) and a short protein in the region between G and L (Figure 1E).  
118 All identified open reading frames (ORF) were flanked by conserved transcription initiation  
119 (UUGU) and transcription termination/polyadenylation sequences (UC[U]<sup>7</sup>) with very short  
120 intergenic region (Table S3). The L protein included common domains such as the  
121 *Mononegavirales*-like RdRP domain (pfam 00946), the mononegavirales mRNA capping region  
122 V (pfam 14318), a paramyxovirus-like mRNA capping enzyme (TIGR04198) and a  
123 *Mononegavirales* virus-capping methyltransferase (pfam 14314).

124 The second virus, named Schistocephalus solidus Jingchuvirus (SsJV), had a circular genome  
125 encoding for a single protein similar to the L protein (Figure 1D) of viruses of the order  
126 *Jingchuvirales* with a maximum of 28% aa identity to the RdRP of Hubei Myriapoda virus 8  
127 (YP\_009330113.1). The predicted L protein possesses a *Mononegavirales* RdRP domain (pfam  
128 00946), a paramyxovirus mRNA capping enzyme (TIGR04198) and the *Mononegavirales* virus-  
129 capping methyltransferase (pfam 14314). No other sequence fragment with similarities to proteins  
130 found in viruses of the order *Jingchuvirales* was found.

131 The third viral genome, named Schistocephalus solidus bunya-like virus (SsBV), had a maximum  
132 of 36% identity to the RdRP of the bunya-like virus Beihai barnacle virus 5 (APG79235.1). The  
133 longest predicted ORF (Figure 2B) possesses a bunyavirus RdRP domain (pfam04196).  
134 Bunyaviruses usually consist of three segments called L, M and S but no other sequence fragment  
135 with similarities to viruses of the order *Bunyavirales* was found. Note that SsBV was only found  
136 in sequencing data from the total RNA library.

137 Finally, three sequences similar to viruses of the families *Totiviridae* and *Chrysoviridae* (Figure  
138 3) were found and named *Schistocephalus solidus* toti-like virus 1 (SsTV1), *Schistocephalus*  
139 *solidus* toti-like virus 2 (SsTV2), and *Schistocephalus solidus* toti-like virus 3 (SsTV3). These  
140 SsTV viral sequences showed the highest similarities to the partial RdRP sequence of Dumyat  
141 virus (QAY29251.1, SsTV1, 27% aa identity and SsTV3, 28% aa identity), or to Hubei toti-like  
142 virus 10 (SsTV2, YP\_009336493.1, 36% aa identity). All three viruses had two ORFs (Figure 3B),  
143 with the second protein encoding for a RdRP similar to Luteovirus, Totivirus and Rotavirus  
144 (pfam02123). NCBI Conserved Domain Search (CDD) revealed that SsTV1 ORF1 encodes for a  
145 protein with homologies to UL36 large tegument protein of Herpes simplex virus (PHA03247).

#### 146 ***Evidence for new virus taxa in Schistocephalus solidus***

147 We inferred a phylogenetic tree using the predicted RdRP amino acid sequences from SsRV, SsJV,  
148 and 111 representative members of the orders *Jingchuvirales* (31 sequences) and *Mononegavirales*  
149 (88 sequences) (Figure 1A). All sequences clustered into previously established genera and  
150 families ratified by the International Committee on Taxonomy of viruses (ICTV) except for the *S.*  
151 *solidus*-associated viruses that constituted distinct clades (Figure 1A, Supplementary figure 1).  
152 Our results show that SsJV belongs to the order *Jingchuvirales*, but likely represents a distinct  
153 taxon from the family *Chuviridae* (Figure 1B). The most closely related viruses, based on the  
154 conserved RdRP, is the Hubei myriapoda virus 8 which has a linear genome that encodes for four  
155 proteins: a glycoprotein, two hypothetical proteins and the RdRP (Figure S1). The most closely  
156 related chuvirus with a circular genome is the Tacheng tick virus 4 that encodes for a glycoprotein,  
157 a nucleoprotein and the RdRP.

158 Our phylogenetic analysis revealed that SsRV belongs to the family *Rhabdoviridae*, grouping  
159 closely with Fox fecal rhabdovirus, Wenling dimarhabdovirus 8 and Wenling dimarhabdovirus 10.  
160 Notably, SsRV represents a new taxon ancestral to *Lyssavirus* and to the dimarhabdovirus  
161 supergroup (Figure 1C). The Bat rhabdovirus, Fox fecal rhabdovirus, and Wenling  
162 dimarhabdovirus 8 and 10 from fish were discovered from metatranscriptomic studies and host  
163 association had not been confirmed and was challenged by the authors (32, 33). The complete  
164 genome of the Fox fecal rhabdovirus, Wenling dimarhabdovirus 8 and SsRV were aligned and  
165 compared to the genomes of Rabies virus (Figure 1E). In contrast to the Rabies virus, viruses  
166 within these new taxa show variable length and seem to be characterized by the presence of one to  
167 three small proteins in the region between G and L.

168 We inferred a second phylogenetic tree using SsBV and the L segment of 78 representative  
169 members of all assigned families within the order *Bunyavirales* (Figure 2). Phylogenetic analysis  
170 confirmed that SsBV has no close known relatives and likely constitutes a new family of viruses.  
171 SsBV was not found to be closely related to the bunya-like viruses discovered in the trematode  
172 *Schistosoma haematobium* (Hubei blood fluke virus 1 and Hubei blood fluke virus 2) (Figure 2A).  
173 We inferred a third phylogenetic tree using SsTV1, SsTV2 and SsTV3 together with 40 viruses  
174 representing the families *Totiviridae*, *Chrysoviridae*, and unassigned members closely-related to  
175 these families (Figure 3). Phylogenetic analyses of toti-like viruses revealed significant differences  
176 between the SsTVs. SsTV1 and SsTV3 cluster together and are most closely related to viruses  
177 discovered in other invertebrates including Lophotrochozoa, Nematoda, Crustacea, and Insecta,  
178 whereas SsTV2 was most closely related to viruses discovered in insects.



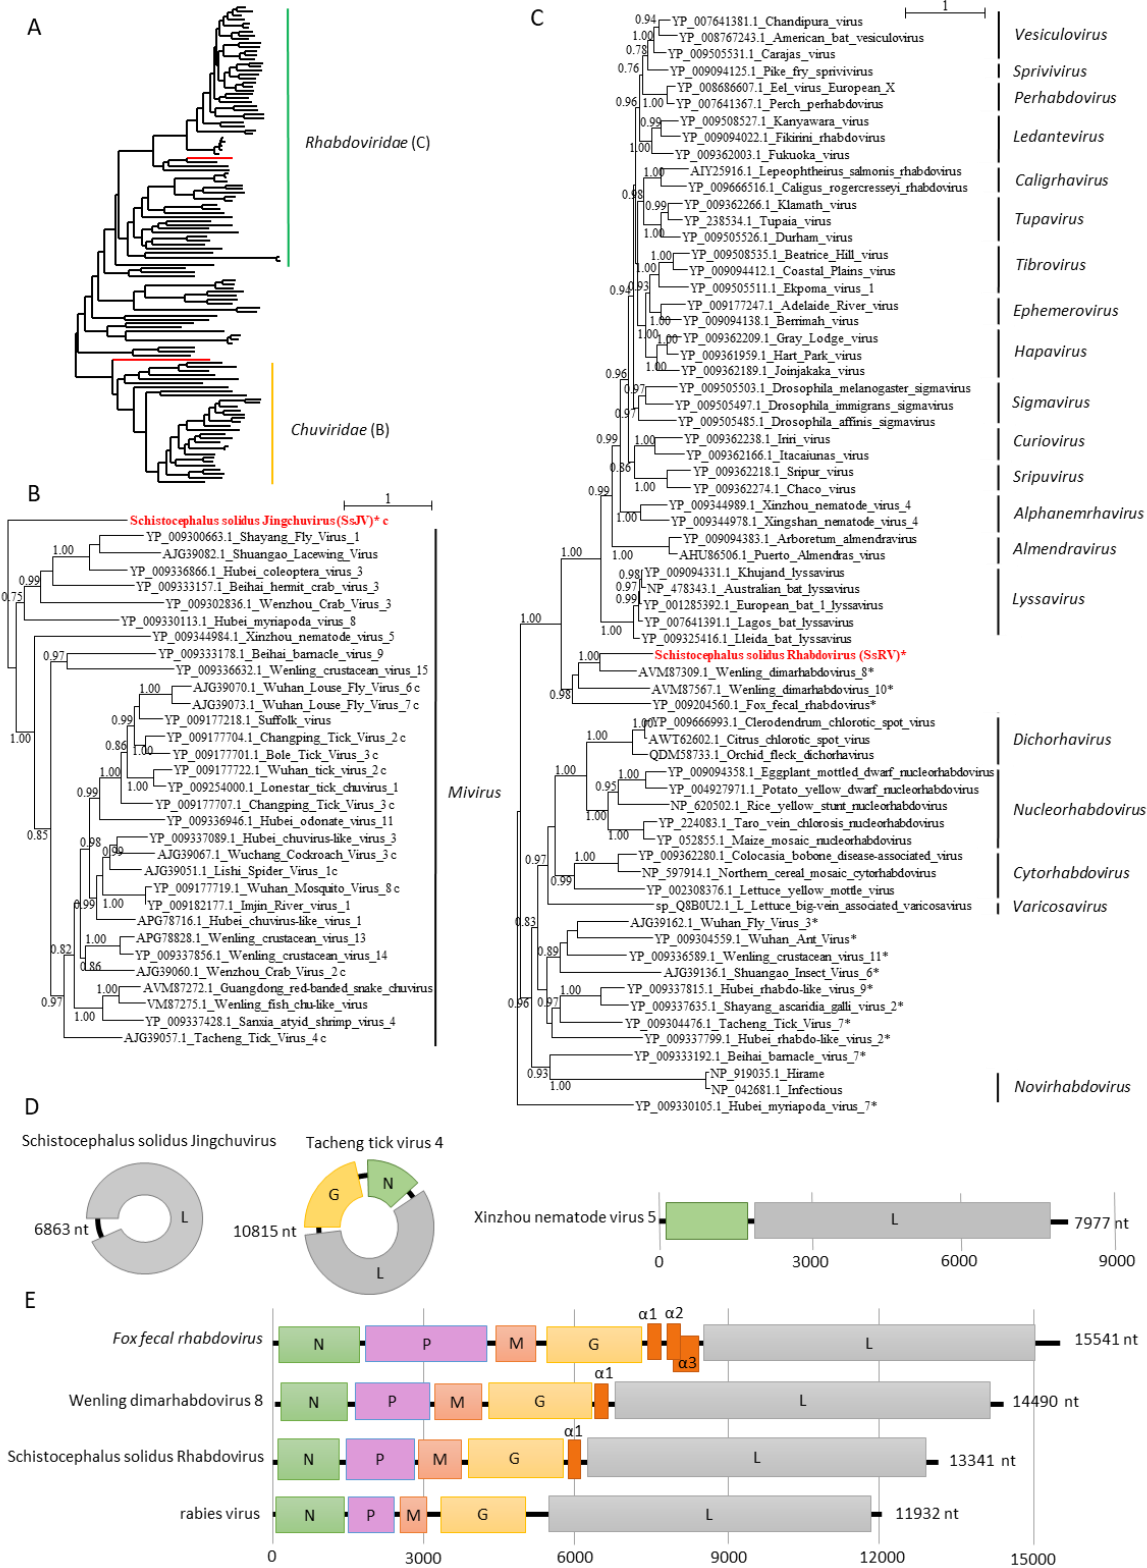

179

180 **Figure 2: Phylogenetic and genomic characterization of SsRV and SsJV.** A) Phylogenetic  
 181 analysis of the RdRP of viruses from the order *Mononegavirales* and *Jingchuvirales*. The tree was

182 inferred with PhyML using the LG substitution model. B and C) close up view of the phylogenetic  
183 tree of the RdRP of viruses from the families *Chuviridae* and *Rhabdoviridae*, respectively. Values  
184 next to the branch indicate the results of a Shimodaira-Hasgawa branch test. Genus names and  
185 family names are provided next to the branches. \* indicates unassigned viruses. c indicates circular  
186 genomes. D and E) Genome organization of viruses from *Schistocephalus solidus* aligned to the  
187 genome of closely related viruses of the families *Chuviridae* and *Rhabdoviridae*, respectively.  
188 Boxes represent putative genes. The black line indicates non-coding regions.

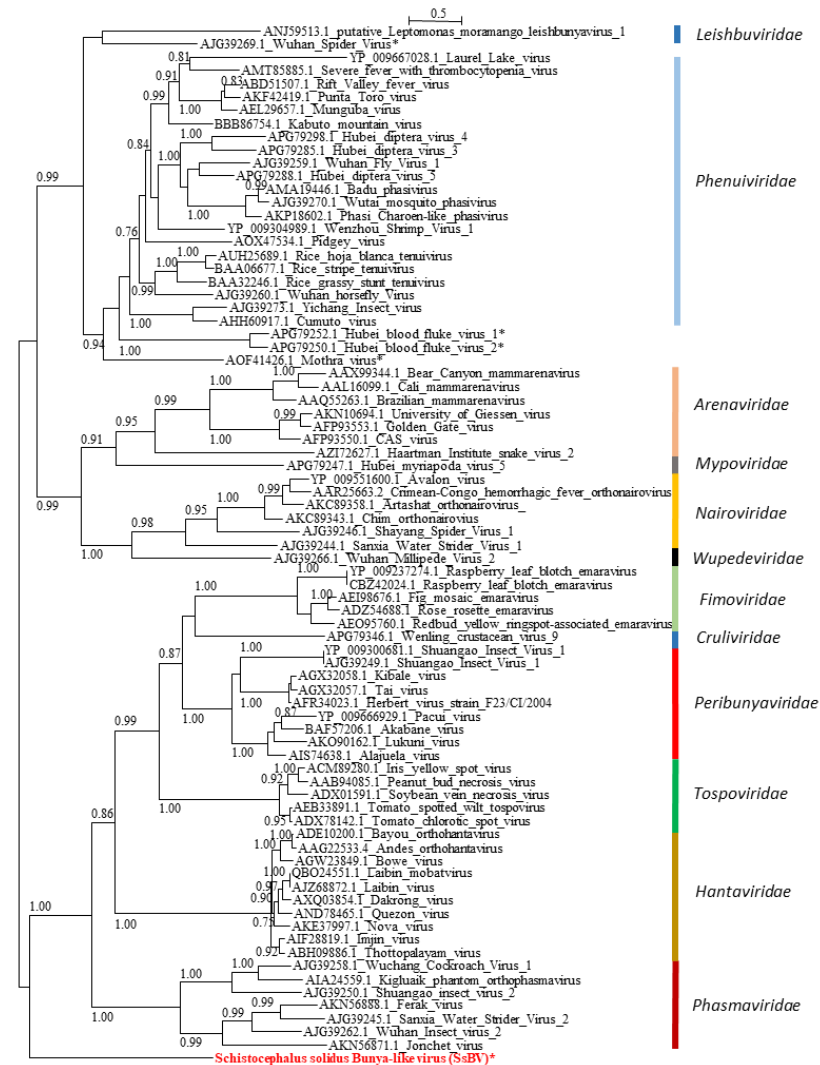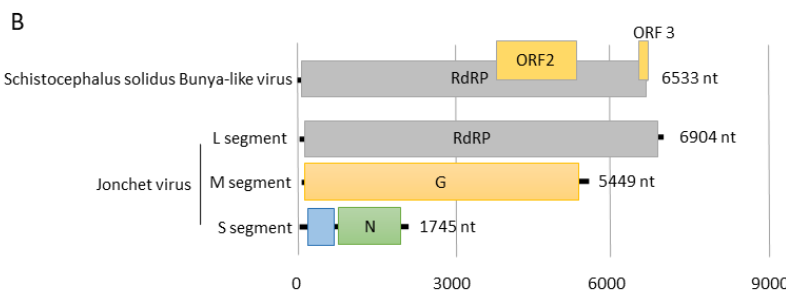

189  
 190 **Figure 3: Phylogenetic and genomic characterization of SsBV.** A) Phylogenetic analysis of the  
 191 RdRP of viruses of the order *Bunyavirales*. The tree was inferred with PhyML using the LG  
 192 substitution model. Values next to the branch indicate the results of a Shimodaira-Hasgawa branch  
 193 test. \* indicates unassigned viruses. Family names are provided next to the branches. B) Genome  
 194 organization of *Schistocephalus solidus* bunya-like virus aligned to the genome of closely related  
 195 viruses.

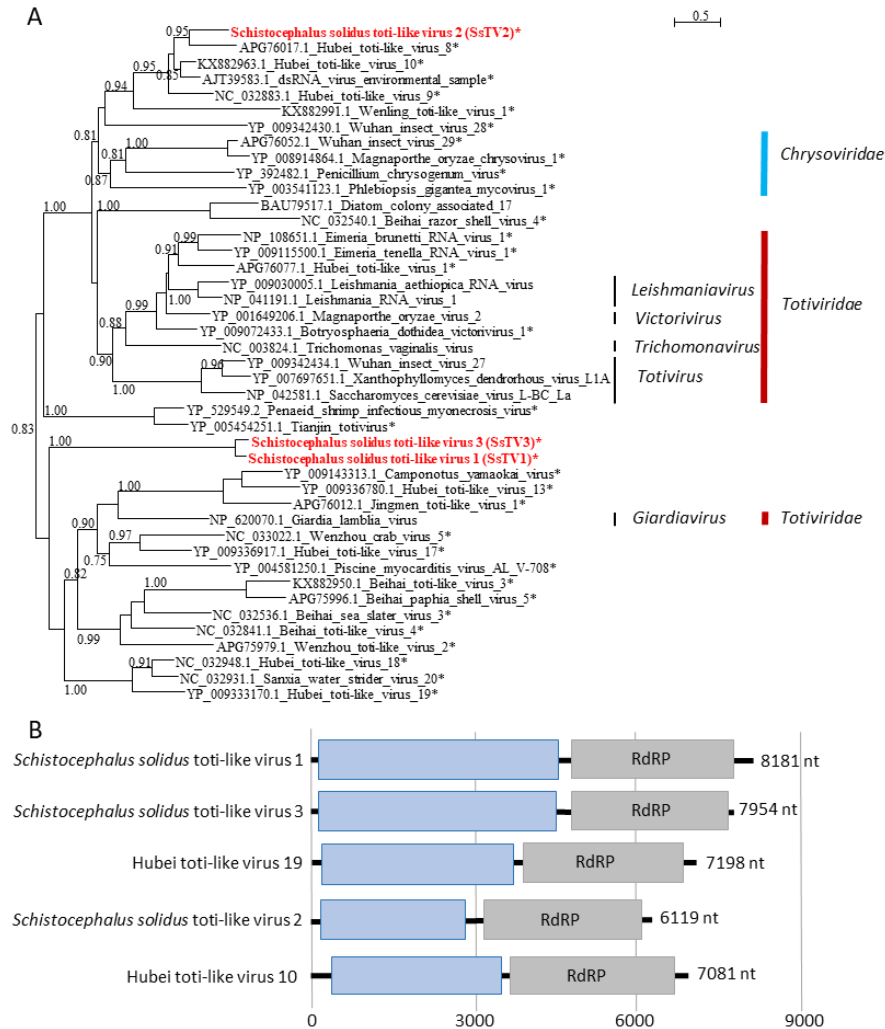

196

197 **Figure 4: Phylogenetic and genomic characterization of SsTV1, SsTV2 and SsTV3. A)**

198 Phylogenetic analysis of the RdRP of toti-like viruses. The tree was inferred with PhyML using

199 the LG substitution model. Values next to the branch indicate the results of a Shimodaira-Hasgawa

200 branch test. \* indicates unassigned viruses. Genus names and family names are provided next to

201 the branches. B) Genome organization of toti-like viruses from *Schistocephalus solidus* aligned to

202 the genome of closely related viruses.

### 203 *Mining S. solidus transcriptomic data for viral sequences*

204 At the time of this study, only two transcriptomic studies of *S. solidus* were publicly available. The

205 first study of *S. solidus* transcriptome used 454 GS FLX Titanium sequencing on individuals from

206 Germany and Norway ((34), PRJEB7355, two biosamples). Blast searches against the 454 reads

207 revealed the presence of related strains of SsJV and SsTV1 in one dataset (ERX589070) and of

208 SsTV2 in two datasets (ERX589070 and ERX589072), confirming further the association of these  
209 viruses with *S. solidus*.

210 More recently, the complete transcriptome of *S. solidus* from Clatworthy Reservoir in Somerset,  
211 England was assembled using Illumina sequencing and made available as Transcriptome Sequence  
212 Archive (TSA; PRJNA304161, 15 individuals) (35). Blast searches against the assembled  
213 transcriptome revealed two contigs with high similarity to SsJV, referred to as SsJV2 and SsJV3  
214 thereafter. SsJV2 (GEEE01006270.1) corresponded to the full-length sequence of a variant with  
215 94% amino acid sequence identity to the RdRP of SsJV. SsJV3 (GEE01008921.1) covered only  
216 part of the SsJV RdRP, where it shared 63% amino acid sequence identity to SsJV.

217 We further investigated the presence of viruses within the samples from England by analyzing raw  
218 sequencing reads. Reads were assembled for each sample; after removing those that aligned  
219 against *S. solidus* genome. Viral contigs were assembled from three of the 15 individuals  
220 (SRR2966898, SRR2966894 and SRR2966897): two adult parasites and one mature infective  
221 plerocercoid. In addition to the above-mentioned SsJV2 and SsJV3, we assembled a full-length  
222 sequence of the L segment of a bunya-like virus, SsBV2, whose full-length genome shares 97.5%  
223 aa identity to the RdRP encoded by SsBV. Partial sequences from toti-like viruses similar to  
224 SsTV2 were identified in two individuals and were named SsTV4 and SsTV5. The sequences  
225 only covered 43% and 31% of the SsTV2 genome length for SsTV4 and SsTV5 respectively. The  
226 consensus sequences obtained revealed that both viruses are distinct and display 95% and 52% aa  
227 identity to SsTV2. Reads from all 15 individuals were then mapped against these partial genome  
228 sequences, revealing that 13 individuals were infected by at least one virus, and many were co-  
229 infected by different viruses (Figure S2).

### 230 ***Prevalence and transmission mode***

231 We tested virus prevalence in plerocercoids from field-sampled sticklebacks from three  
232 independent localities in the Matsu Valley, Alaska (Figure 5A, Figures S3-S9). Overall, SsRV was  
233 highly prevalent in *S. solidus* in all three tested localities, with an average prevalence of 81% in  
234 plerocercoids. In contrast, SsJV, and SsTV2 were detected in 10% and 4% of plerocercoids,  
235 respectively, while the remaining viruses (SsTV1, SsTV3, and SsBV) were detected in only 2%  
236 of tested plerocercoids. Interestingly, while SsRV, SsJV and SsTV1 were found in all populations,

237 SsTV2 was only found in Cheney and Loberg lakes, and SsTV3 and SsBV were only found in  
238 Loberg and Wolf lakes. Only 17.5% of plerocercoids across all populations were free of all viruses.

239 We tested virus presence in worms collected from twenty-four sticklebacks that were co-infected  
240 by two or three plerocercoids (Figure 5A, Figures S3 and S10). In many cases, virus-infected and  
241 non-infected plerocercoids co-infected the same stickleback host. This was observed for SsRV  
242 (eight instances), SsJV (two instances), SsBV (one instance), SsTV1 (two instances), SsTV2 (four  
243 instances), and SsTV3 (two instances). Overall, 79% of the plerocercoids from co-infected  
244 sticklebacks were SsRV(+), which is not significantly different from the overall prevalence in the  
245 populations and suggests little to no horizontal transmission at this developmental stage.

246 We tested the presence of *S. solidus*-associated viruses in coracidia obtained from *in vitro* breeding  
247 to assess the potential for vertical transmission. Both complete genome sequencing and diagnostic  
248 PCR results indicated the presence of viruses in lab bred coracidia (Figure 5A). Among the 38  
249 families that were obtained from outbreeding plerocercoids *in vitro*, thirty-four families were  
250 SsRV(+), four families were SsJV(+), one family was SsTV1(+), one family was SsTV2(+), and  
251 one family was SsTV3 (Figure S9). None of the families were SsBV positive based on PCRs and  
252 we later confirmed that none of the plerocercoids randomly selected for breeding were infected by  
253 this virus. The lack of lab bred SsBV(+) families prevented further studies and testing of vertical  
254 transmission for this virus. The presence of SsRV, SsJV, SsTV1, SsTV2, and SsTV3 in coracidia  
255 indicates that these viruses are vertically transmitted.

256 To further determine the rate of vertical transmission, we experimentally infected copepods with  
257 coracidia hatched from virus(+) families. The presence of viruses in proceroids was then assessed  
258 for 50 individuals (Figure 5B). While SsTV2 and SsTV3 were found in coracidia, these families  
259 showed very low hatching success, preventing us from conducting experimental infections of  
260 copepods to test the rate of vertical transmission. SsRV and SsJV were found in all 50 tested  
261 proceroids, indicating a 100% success of vertical transmission of both viruses (Figures S11-S13).  
262 In contrast, 48% of the proceroids were infected by SsTV1 (Figure S13).

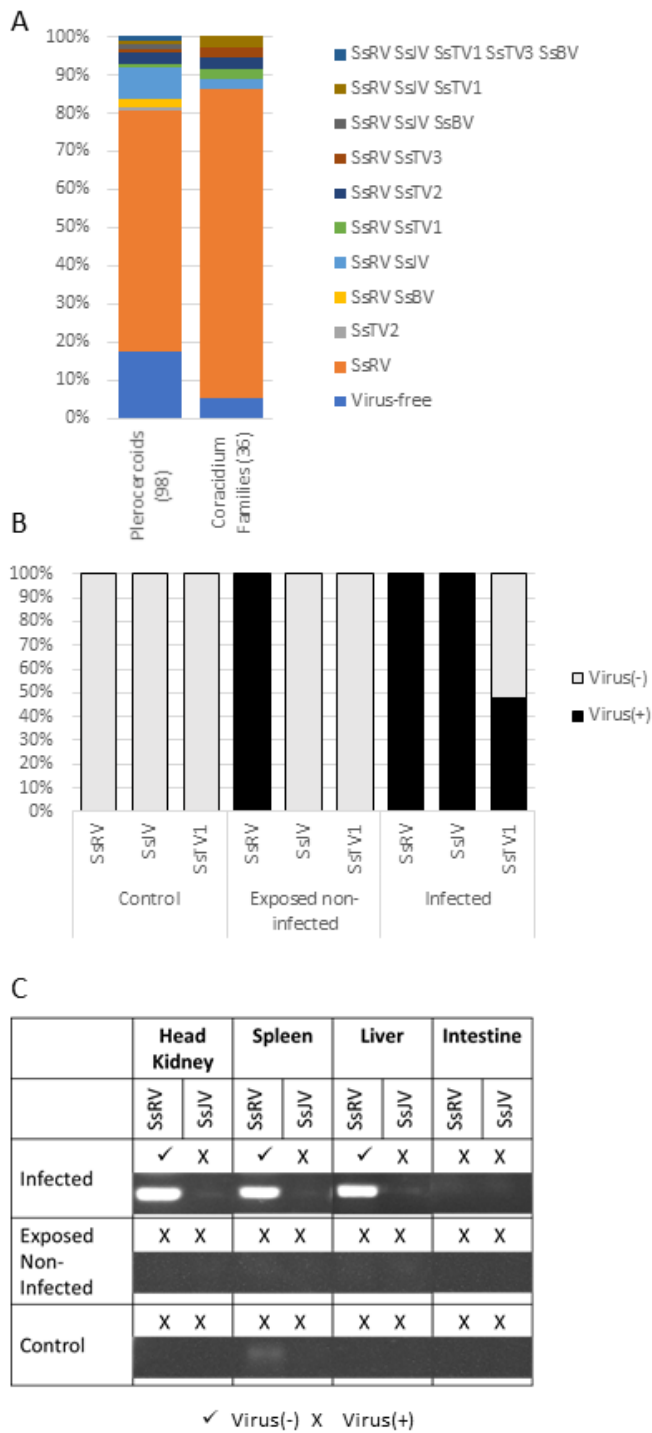

263

264 **Figure 5: Virus prevalence and transmission over the course of *S. solidus* life cycle.** (A) Virus  
 265 prevalence in plerocercoids from field-collected sticklebacks and in coracidia from *in vitro*  
 266 generated families. (B) SsRV, SsIV, and SsTV1 presence was assessed in copepods



267 experimentally infected by *S. solidus*. (C) SsRV and SsJV presence was assessed in tissues of  
268 sticklebacks experimentally infected by *S. solidus*.

### 269 ***Cross-species transmission to the hosts***

270 To test SsRV, SsJV, and SsTV1 cross-species transmission to the first intermediate host, cyclopoid  
271 copepods, we tested their presence in exposed but non-infected copepods. We did not test their  
272 presence in infected copepods as the dissections were too subtle to ensure the absence of  
273 contamination from *S. solidus*. SsRV, but not SsJV and SsTV1, was found in exposed but non-  
274 infected copepods (Figure S13). No virus was found in control non-exposed copepods. To confirm  
275 that no contamination from *S. solidus* was present in exposed but not infected copepods, we used  
276 *S. solidus* specific primers to attempt to detect the parasite (Figure S15). *S. solidus* was not found  
277 in any of these individuals. However, as we were unable to test if the viruses were associated with  
278 copepod tissues or only present on the copepods surface.

279 To assess the potential for *S. solidus*-associated viruses to be transmitted to the intermediate fish  
280 host, we conducted experimental infections of sticklebacks with individual copepods infected with  
281 SsRV(+) or SsJV(+) parasites. Since SsTV1 only had a 48% success of transmission it was  
282 excluded from this experiment. All four stickleback successfully infected by a SsRV(+) parasite  
283 carried the virus within their liver, spleen and head kidney, but the virus was absent from the fish  
284 gut (Figure S16). The one fish that was successfully infected by a SsJV(+) parasite did not transmit  
285 the virus to its fish host (Figure S16). Exposed but non-infected sticklebacks and control non-  
286 exposed sticklebacks were not infected by either virus (Figure 4).

287 To further test for the rate of cross-species transmission of the highly prevalent SsRV to the fish  
288 intermediate host, the presence of SsRV was tested in the liver of field-sampled sticklebacks that  
289 were infected by SsRV(+) parasites. Our results showed the presence of SsRV in the liver of all  
290 24 stickleback infected by a SsRV(+) parasite (Figure S18). Among those, 6 sticklebacks were co-  
291 infected by both SsRV(+) and SsRV(-) parasites, and yet the virus was found in the fish liver  
292 tissue.

293 To assess the potential for SsRV, SsJV, SsTV1, SsTV2 and SsTV3 to be transmitted to infected  
294 definitive hosts, we tested the presence of viruses within the secretory products of breeding adult  
295 *S. solidus*. We found SsRV in the culture medium used for breeding all twelve SsRV(+) families



296 whereas we did not find SsJV, SsTV1, SsTV2, or SsTV3 in the culture medium that was used for  
297 breeding families (Figure S17).

## 298 **Discussion**

### 299 *A glimpse into a parasitic flatworm viral diversity*

300 In the current study, we used viral purification and shotgun sequencing to identify viruses from  
301 the cestode *S. solidus*. We purified viruses from few individuals from three lakes in the Matsu  
302 Valley, Alaska, and discovered six new species of viruses; a negative strand RNA virus of the  
303 order *Mononegavirales* and family *Rhabdoviridae* (SsRV), a negative-strand RNA virus of the  
304 order *Jingchuvirales* (SsJV), a negative sense RNA virus of the order *Bunyavirales* (SsBV) and  
305 three double stranded toti-like viruses from unassigned taxonomic groups (SsTV1, SsTV2, and  
306 SsTV3). We subsequently found that SsTV1, SsTV2, SsTV3, SsBV, and to a lesser extent SsJV  
307 have very low prevalence in field-collected specimens. Genotyping has revealed that *S. solidus*  
308 populations remain distinct in individual lakes despite the high motility of its avian definitive host,  
309 and different parasite clades co-exist on a given continent (36). Given our sequencing of relatively  
310 few individuals in a small number of lakes from a restricted geographic area, it is likely that  
311 sequencing purified viruses from a greater number of individuals, and extending the geographic  
312 area, will reveal the presence of a greater diversity of *S. solidus*-associated virus species. In  
313 addition, *S. solidus* can be found in freshwater lakes throughout the Northern hemisphere (28, 37-  
314 39). Mining the *S. solidus* transcriptomic data generated from few individuals from England and  
315 Germany, revealed related species of jingchuviruses, bunya-like viruses and toti-like viruses. This  
316 confirms that *S. solidus* populations in other lakes and on other continents are infected by different  
317 strains of the same viruses reported here. Due to their short generation time, viruses can rapidly  
318 diverge when physically isolated in different host populations, increasing viral diversity. Given  
319 the great genetic diversity of *S. solidus*, mediated mostly by geographic isolation, but also by  
320 selection pressures imposed by the stickleback host (36), *S. solidus* most likely hosts a much  
321 greater diversity of viruses than those identified here by sampling a tiny fraction of the parasite's  
322 geographic range and genetic diversity. Further investigations of viruses associated with *S. solidus*  
323 could unravel the role of parasite broad geographic distribution and strong genetic structure in  
324 virus diversification.

325 Parasitic flatworms have specialized in parasitizing vertebrates and literally all vertebrates are  
326 parasitized by at least one species of parasitic flatworms. They constitute a very diverse and

327 successful phylum. Here, SsBV and SsBV2 were not closely related to recently sequenced  
328 bunyaviruses discovered in Schistosomes, who were more closely related to the family  
329 *Phenuiviridae* (22). This result hints at the potentially large diversity of bunya-like viruses  
330 associated with Neodermatans and suggests that a more comprehensive characterization of viruses-  
331 associated with parasitic flatworms will likely lead to the discovery of many new viral taxa.

### 332 ***Genome completeness***

333 While the full-length genomes of SsRV, SsTV1, SsTV2, and SsTV3 were obtained, it is unclear  
334 whether SsJV and SsBV genomes are complete. Our assemblies of SsJV and SsBV revealed a  
335 single genome that encodes for the RdRP. SsJV belongs to the recently accepted order  
336 *Jingchuvirales* within the class *Monjiviricetes*. The order currently contains only the family  
337 *Chuviridae* and the genus *Mivirus* with 29 species (40). Viruses within this order have small, often  
338 segmented and circular genomes (41). Similarly, SsBV belongs to the order *Bunyavirales* that  
339 includes viruses with segmented genomes consisting of two to six fragments that are packaged  
340 stochastically (42). We were unable to find any other sequence fragments related to chuviruses or  
341 bunya-like viruses in our samples or in the transcriptome of *Schistocephalus solidus* probably  
342 because additional SsJV and SsBV segments are significantly divergent from known viruses,  
343 hindering our ability to detect these segments through sequence similarity-based searches. Another  
344 possibility is that SsJV may be satellite or helper virus encapsidated by another virus (43). This  
345 could explain the fact that SsJV was detected in samples after nuclease treatment, its high rate of  
346 vertical transmission and that it was never found in an individual that was not already infected by  
347 SsRV. SsBV, however, was absent from sequencing purified viruses and was only discovered  
348 because we sequenced total RNA, which may indicate its sensitivity to our viral purification  
349 strategy (e.g., nuclease treatments). Thus, an alternative hypothesis is that SsBV lacks capsids or  
350 envelop proteins and relies solely on vertical transmission similarly to viruses of the family  
351 *Narnaviridae*.

### 352 ***Phylogenetic position***

353 Our phylogenetic analyses revealed that all newly discovered viruses are distinct from the known  
354 diversity of viruses and constitute new undescribed taxa. These viruses also often had an ancestral  
355 position to other viruses suggesting that viruses of parasitic flatworms may have played a role in  
356 virus evolution. Previous studies showed that the order *Jingchuvirales* has an ancestral position to  
357 the order *Mononegavirales* (41). SsJV appears to have an ancestral position to other viruses within

358 the order *Jingchuvirales* and hence, may be among the most ancestral of all known viruses within  
359 the orders *Mononegavirales* and *Jingchuvirales*. Similarly, SsTV1 and SsTV3 clustered together  
360 and had an ancestral position to all closely related viruses found in other invertebrates. SsBV did  
361 not cluster with known viruses and its phylogenetic position fell between the cluster of viruses of  
362 the families *Phasmaviridae*, *Hantaviridae*, *Tospoviridae*, *Peribunyabiridae*, *Cruliviridae* and  
363 *Fimoviridae*, and the cluster of viruses of the families *Phenuiviridae*, *Arenaviridae*, *Mypoviridae*,  
364 *Nairoviridae* and *Wupedeviridae*, again indicating an ancestral nature to many other viruses. A  
365 more robust interpretation can be made from the phylogenetic position of SsRV that suggests an  
366 ancestral role of parasitic flatworms in the evolution of the *Lyssavirus*. The family *Rhabdoviridae*  
367 includes viruses of vertebrates, invertebrates, and plants grouped within 20 genera (44, 45). Well  
368 known viruses within this family includes the rabies virus, vesiculoviruses and potato yellow dwarf  
369 virus that are of public health, veterinary and agricultural importance (46). We found that SsRV is  
370 transmitted to *S. solidus* intermediate copepods and stickleback hosts over the course of infection  
371 and could potentially be transmitted to its definitive avian host during breeding, which would  
372 facilitate host switch from a parasitic flatworm to its vertebrate host. Based on SsRV phylogenetic  
373 position, and with the support of these experimental results, we propose the following evolutionary  
374 scenario for the dimarhabdovirus supergroup: An ancestral rhabdovirus of a parasitic flatworm  
375 acquired the ability to replicate exclusively in vertebrates, diverging to an ancestral *Lyssavirus*.  
376 Then, an ancestral virus of the dimarhabdovirus supergroup acquired the ability to use insects as  
377 vectors to increase its transmission among vertebrate hosts (47). Finally, rare additional host shifts  
378 events can explain the host association of different genera within the dimarhabdovirus supergroup  
379 (47). Parasites have a close and intimate relationship with their hosts that could favor virus host  
380 shifts. Multi-host parasites, such as parasitic flatworms, have the potential to acquire or transmit  
381 viruses from and to each of their hosts, thus providing the means for viruses to complete major  
382 host shifts across distantly related host taxa. Clearly, future studies characterizing a greater  
383 diversity of viruses of parasitic flatworms and their phylogenetic position relative to the diversity  
384 of viruses within their intermediate and definitive hosts has the potential to fill major gaps in our  
385 understanding of virus evolution.

### 386 ***Transmission and impact on parasite fitness***

387 Viral infections may have implications for the ecology of their parasitic hosts. Viruses of parasites  
388 can either be beneficial for the parasite by increasing infectivity or transmission to the next host,

389 or they can be hyperparasitic and result in parasite hypovirulence that benefits the parasitized host  
390 (17). The nature of virus interaction with its parasitic host will have downstream effects on the  
391 interaction between host and parasite and on the evolution of the combined system. Indeed, hyper-  
392 and hypovirulent viruses would displace the parasite virulence level away from the optimal  
393 evolutionary strategy (ESS) and act as selection pressures on virulence evolution (48). ESS theory  
394 predicts that strict vertical transmission should be rare excepting if the virus provides fitness  
395 advantages (49). However, we found five viruses (SsRV, SsJV, SsTV1, SsTV2, and SsTV3) that  
396 are vertically transmitted. The one virus that was not found in coracidia, SsBV, was not present in  
397 any parasite used for breeding preventing us from testing the vertical transmission of SsBV, which  
398 remains unknown. Our experimental design did not allow us to determine whether only one or  
399 both parents were infected by the tested viruses at the time of breeding because eggs remained  
400 attached to the surface of adult worms after breeding. Therefore, it is unclear whether the 48% rate  
401 of vertical transmission of SsTV1 is due to only one parent being infected by this t. Similarly, the  
402 100% rate of vertical transmission observed with SsRV(+) and SsJV(+) could result from both  
403 parents being infected by the virus and vertical transmission of viruses by mothers only (50). In  
404 the future, this experimental design could be improved by collecting small tissue samples of adult  
405 worms before breeding in order to assess the viruses' presence in each parent. Regardless of the  
406 limitation of our design, the high rate of vertical transmission suggests that SsRV, SsJV, and  
407 SsTV1 probably have low virulence, or may even be beneficial for *S. solidus*. This is further  
408 supported by the presence of virus(+) and virus(-) parasites in co-infected sticklebacks indicating  
409 that these viruses have a low rate of horizontal transmission at this developmental stage.

410 SsRV maintained high prevalence in all three tested populations and is cross-species transmitted  
411 to its hosts, further suggesting that it could be beneficial for the parasite or detrimental to the  
412 parasitized hosts. The absence of SsRV in the stickleback intestine indicates that the virus is likely  
413 transmitted to the host while the parasite is developing to sexual maturity in the body cavity (51).  
414 SsRV was found in the muscle of the body cavity, and in the spleen, liver and head kidney of  
415 parasitized sticklebacks. The fish liver, spleen and head kidneys are involved in many biological  
416 processes in sticklebacks, such as immune response to infection by *S. solidus*, metabolism and  
417 energy storage (52-58). The ability of the virus to replicate in stickleback cells, and its impact on  
418 host immune response to parasite infection remains to be assessed but its presence is likely  
419 sufficient to stimulate the host immune system. For example, SsRV could be used as a biological

420 weapon to deter the host immune response away from the parasite (17). Other studies have revealed  
421 the presence of RNA viruses in the human parasites *Trichomonas vaginalis*, *Giardia lamblia*, and  
422 *Leishmania spp.* (59-62). These viruses impact interactions between host and parasite: the  
423 *Trichomonavirus*, and *Leishmaniavirus* exacerbate virulence of their parasitic hosts whereas  
424 *Giardiavirus* is associated with a decrease in parasite virulence (63). The *Trichomonavirus* and  
425 *Leishmaniavirus* induce Type I interferon (IFN) and elevated proinflammatory response that  
426 controls the severity of the diseases (64, 65). Examples of parasitic flatworms infection that impede  
427 antiviral immunity and are associated with increased viral load are abundant, but in some cases, a  
428 protective effect has also been observed (66, 67). The transmission of viruses of parasitic flatworm  
429 to hosts can explain apparent cross-reactions of the immune system. Interestingly, even though  
430 SsRV was not found in any fish tissues when parasite infection was not successful, it was found  
431 in copepods that were exposed to *S. solidus* but resisted infection. We used *S. solidus* specific  
432 primers to confirm that the parasite was no longer present in exposed copepods and ensured that  
433 the virus was indeed associated with the copepod. It remains to be determined if SsRV can replicate  
434 in copepods and infect *S. solidus* that the copepod may encounter at a later time. Copepods could  
435 potentially serve as vectors or reservoirs of SsRV, facilitating horizontal transmission between  
436 procercoids. That being said, our knowledge of *S. solidus* prevalence and exposure rate in  
437 copepods in field settings is very limited. Therefore, we can only speculate regarding the potential  
438 role of copepods in SsRV ecology.

439 In contrast, SsJV, SsTV1, SsTV2, SsTV3, and SsBV had low prevalence in all Alaskan tested  
440 populations. The low prevalence of SsJV and SsTV1 is particularly surprising given the estimated  
441 high success of vertical transmission. This result suggests that at some point during the parasite  
442 life cycle, SsJV(+) and SsTV1(+) parasites are less successful than SsJV(-) and SsTV1(-) parasites  
443 and that these viruses may negatively impact *S. solidus* fitness. Alternatively, the low prevalence  
444 of SsJV and SsTV1 may result from competition with the highly prevalent SsRV or a lower success  
445 rate of vertical transmission from individuals co-infected with SsRV. In support of this second  
446 hypothesis, SsRV was not found in transcriptomic data of *S. solidus* from Europe whereas  
447 Jingchuviruses and Toti-like viruses were present. Given the very low number of individual worms  
448 (two and fifteen respectively for each Bioproject), the discovery of these viruses suggests that their  
449 prevalence might be higher in Europe. Functional experiments to determine the fitness impact of  
450 these viruses, alone and in combination, on *S. solidus* and its stickleback host need to be conducted.

## 451 **Perspectives**

452 Viruses and parasites alike have significant impacts in health sciences, but until recently they have  
453 mostly been studied separately by virologists and parasitologists, respectively. Herein, we  
454 discovered vertically transmitted viruses in the cestode *S. solidus*, and showed that at least one of  
455 these can be transmitted to parasitized hosts. Given the importance of viruses and their prevalence  
456 in all cellular organisms, any parasitic flatworm should be considered a holobiont and the presence  
457 of associated microbes should be investigated (16). The viruses we discovered in *S. solidus* can  
458 serve as reference to facilitate the search for related species in other parasitic flatworms. For  
459 parasitologists, it is like a Pandora's box has been opened, with a myriad of new possibilities for  
460 understanding parasite-associated diseases, and for the development of therapeutic strategies.  
461 Characterizing the role of parasite viruses in host-parasite interactions will allow us to identify the  
462 real culprits for observed symptoms, or diseases, a necessary step towards the development of new  
463 targeted therapies to treat or prevent debilitating diseases that have been plaguing populations for  
464 decades. A striking example of the therapeutic potential is the successful development of a vaccine  
465 that target the *Leishmaniovirus* and provide a cell-mediated immune protection that has the  
466 potential to reduce exacerbated forms of leishmaniasis (68).

## 467 **Materials and Methods**

### 468 **Initial sample processing and sequencing for virus detection**

469 *Schistocephalus solidus* field-collected specimens were initially screened for the presence of  
470 viruses through viral purification and shotgun sequencing. For this purpose, *S. solidus*  
471 plerocercoids were dissected out of four sticklebacks collected in Cheney Lake, Alaska (61° 12'  
472 17" N, 149° 45' 33") in June 2016 resulting in four parasite samples. The plerocercoids were cut  
473 into pieces and immediately transferred into phosphate-buffered saline (PBS) for virus purification  
474 through filtration followed by chloroform and nuclease treatment according to Ng et al (69, 70)  
475 with some modifications to the protocol. Briefly, tissue samples were homogenized in sterile PBS  
476 by bead beating with 3 mm glass beads. The homogenates were centrifuged for 1 min at 6000 rpm  
477 and pellets were discarded. The recovered supernatants were further diluted with 500 µl of PBS  
478 and centrifuged at 6000 rpm for 6 min to remove remaining cell debris. The supernatants were  
479 then filtered successively through 0.4 µm and 0.22 µm sterile cellulose acetate filters (Corning  
480 CAT# 8162) and filtrates containing the viral fraction were incubated for 10 min in 0.2 volumes  
481 of chloroform. The viral fraction was then recovered from the aqueous phase after centrifugation



482 for 20 seconds at 20,000 rpm. A second chloroform treatment was applied to ensure removal of  
483 bacterial contaminants. The viral fraction was further purified by treating with 2.5 U of DNase I  
484 and 0.25 U of RNase A at 37°C for 3 hours to eliminate non-encapsidated DNA and RNA. EDTA  
485 (pH = 8, Sigma Aldrich CAT# E7889) was added at a final concentration of 20mM to inactive  
486 nucleases prior to nucleic acid extraction.

487 Viral DNA and RNA were simultaneously extracted using the QIAamp Mini Elute Virus Spin Kit  
488 according to manufacturer's instructions. DNA was then removed using a Turbo DNase treatment  
489 (Thermofisher CAT# AM1907). Four sequencing libraries, one per parasite sample, were prepared  
490 with the NuGen Ovation Universal RNA-Seq System (CAT#0343) following the standard  
491 protocol and 18 PCR cycles. Libraries were used for single-end sequencing (1 x 150bp) on an  
492 Illumina Hi-Seq 4000 (Institute of Biotechnology at Cornell University). We obtained 10.22,  
493 12.57, 10.81 and 1.54 million reads for each respective sample. Sequences were processed through  
494 Stony Brook University Seawulf high performance computing cluster. For each dataset, adapters  
495 were removed using Trimmomatic version 0.36 with default settings and PhiX174 contaminants  
496 were removed using Bowtie 2 (--very-sensitive-local) (71). Sequence quality after trimming was  
497 verified with FastQC version 0.11.5 (72). *De novo* assembly was completed by pooling sequence  
498 data from all four samples using Trinity (31). Contigs representing partial viral sequences similar  
499 to various rhabdoviruses and chuviruses were identified through BLAST searches against  
500 GenBank non-redundant database (BLASTx, e-value < 10<sup>-10</sup>). The partial sequences represented  
501 two viruses, a rhabdovirus, named Schistocephalus solidus Rhabdovirus (SsRV) and a chuvirus  
502 named Schistocephalus solidus Jingchuvirus (SsJV).

### 503 **Sampling and *in-vitro* culturing of *S. solidus* for virus genome sequencing and experimental** 504 **infections**

#### 505 ***Field sampling***

506 The detection of viral sequences in plerocercoids collected from Cheney Lake prompted further  
507 sampling of *S. solidus* from various lakes to complete detected viral genomes, screen for other  
508 viruses, evaluate the prevalence and distribution of detected viruses, and perform experimental  
509 infections (Figure 1). In June of 2018, 31, 20, and 46 plerocercoids were collected from  
510 sticklebacks fished from Cheney Lake, Wolf Lake (61° 38' 36" N, 149° 16' 32" W), and Loberg  
511 Lake (61° 33' 33.5" N 149° 15' 28.9" W), respectively. For a subset of stickleback hosts, the liver

512 was collected. Whole plerocercoids and fish tissue samples were transferred into RNA later for  
513 future analyses.

#### 514 ***In-vitro culture of S. solidus plerocercoids***

515 Freshly collected plerocercoids were used for *in vitro* breeding by placing size-matched pairs into  
516 sealed biopsy bags (26, 50, 73). Each pair was incubated for 4 days at 40°C into 250ml of  
517 Minimum Essential medium (MEM Sigma M2279) enriched with HEPES buffer (Sigma CAT#  
518 83264, 50ml l<sup>-1</sup>), Antibiotic antimycotic (Sigma CAT# A5955, 10ml l<sup>-1</sup>), L-glutamin (Sigma CAT#  
519 G7513, 10mmol l<sup>-1</sup>) and glucose (Sigma CAT# G7021, 40ml l<sup>-1</sup>). Eggs were collected and the  
520 culture medium was replaced every 48 hours for 4 days. Upon collection, the eggs were washed 5  
521 times in sterile water and stored at 4°C in the dark. Families were bred for parasites from each  
522 lake, resulting in 16 families from Cheney lake, 13 families from Wolf lake, and 9 families from  
523 Loberg lake. Plerocercoids used for breeding were then transferred into RNA later and a sample  
524 of culture medium was mixed V/V with RNA later for future analyses.

#### 525 ***Egg hatching and processing for virus detection and sequencing***

526 Newly hatched coracidia from *S. solidus* families from Wolf Lake (six families), Loberg Lake  
527 (two families), and Cheney Lake (two families) known to carry SsRV or SsJV viruses (detected  
528 via PCR, see below) were used for a second sequencing effort to complete the genomes and  
529 potentially detect more viruses. To stimulate egg hatching, eggs were incubated in deionized  
530 water for 3 weeks at 22°C in the dark before being exposed to UV light for 1 hour, placed in the  
531 dark overnight and exposed to UV light for 3 more hours (50). Newly hatched coracidia were  
532 collected through centrifugation at 6,500 rpm or 5 min at 4°C. To purify viruses, coracidia  
533 samples were homogenized in sterile suspension medium (SM) buffer [100 mM NaCl, 8 mM  
534 MgSO<sub>4</sub>·7H<sub>2</sub>O, 50 mM Tris-Cl (pH = 7.5)] through bead beating in a Fisherbrand Bead Mill 4  
535 homogenizer (Fisher Scientific CAT# 15-340-164) for 1 min using a mixture of 0.1 mm and 1  
536 mm glass beads. Homogenates were then centrifuged at 8,000 x g for 10 min and the  
537 supernatants containing the viral fraction were filtered through a 0.45 µm Sterivex filter (Fischer  
538 Scientific CAT# SVHV010RS) to remove cells. Free DNA and RNA were removed from the  
539 viral fraction by incubating filtrates with a nuclease cocktail consisting of 1X Turbo DNase  
540 Buffer, 21U of Turbo DNase (Fisher Scientific CAT# AM2238), 4.5U of Baseline-ZERO DNase  
541 (Epicenter CAT# DB0711K), 112.5U Benzonase (Fisher Scientific CAT# 707463), and 10



542  $\mu\text{g/mL}$  RNase A (Fisher Scientific CAT# AM2294) at 37 °C for 2 h. Nucleases were inactivated  
543 with 20 mM EDTA prior to nucleic acid extraction.

544 Viral RNA was extracted from 200  $\mu\text{l}$  of purified viral fraction using the RNeasy kit (Qiagen  
545 CAT# 74104) with the on-column DNase digestion step following manufacturer's  
546 recommendations. In addition, total RNA extracts obtained from lab raised plerocercoids and  
547 coracidia from each lake (see below) were processed alongside RNA extracts from the purified  
548 viral fraction. RNA was reverse-transcribed using the SuperScript IV First Strand Synthesis  
549 System (Fisher Scientific CAT#18091050) with random hexamers followed by second-strand  
550 cDNA synthesis using the Klenow Fragment DNA polymerase (New England Biolabs  
551 CAT#M0212S). The resulting products were cleaned using the AMPure XP Purification system  
552 (Beckman Coulter CAT# A63880). Purified cDNA samples from the viral fraction (V) and those  
553 from total RNA (T) were pooled into two samples, namely the V-pool and the T-pool. Both  
554 pools were fragmented to 300 bp using a Covaris M220 instrument at the Molecular Genomics  
555 Core at the H. Lee Moffitt Cancer Center & Research Institute. Next-generation sequencing  
556 library construction was performed with the Accel-NGS 1S Plus DNA Library Kit for Illumina  
557 Platforms (Swift Biosciences CAT# 10024) following manufacturer's instructions for DNA  
558 inputs  $<1 \text{ ng}/\mu\text{l}$  and 18 cycles of dual indexing PCR for the V-library. For the T-library,  
559 fragmented RNA was processed following the protocol for DNA inputs  $> 10 \text{ ng}/\mu\text{l}$  and 10 cycles  
560 of dual indexing PCR. Both libraries were commercially paired-end sequenced ( $2 \times 150 \text{ bp}$ ) on  
561 an Illumina HiSeq 4000 System at GENEWIZ.

562 Sequences were processed through the University of South Florida high performance computing  
563 cluster. Raw sequences were trimmed for quality and to remove indexing adapters using  
564 Trimmomatic version 0.36.0 (74) with default parameters except for a read head crop of 10 bp  
565 instead of zero. Sequence quality after trimming was verified with FastQC version 0.11.5 (72).  
566 Due to the high number of indexing PCR cycles, quality-filtered sequences from the V-library  
567 were assembled following a pipeline for PCR amplified libraries (75). To do this, sequences  
568 were dereplicated using the Clumpify tool from the BBtools package  
569 ([sourceforge.net/projects/bbmap/](https://sourceforge.net/projects/bbmap/)). Dereplicated sequences were then assembled using single cell  
570 SPAdes (76). Quality-filtered sequences from the T-library were assembled with RNAspades.  
571 Contigs larger than 1000 bp were compared (BLASTx, e-value  $< 10^{-10}$ ) against a viral protein

572 database containing sequences from the NCBI Reference Sequence (RefSeq) database (RefSeq  
573 Release number 93, <https://www.ncbi.nlm.nih.gov/refseq/>). This sequencing effort resulted in the  
574 detection of contig sequences representing SsJV, SsRV and two novel toti-like viruses, named  
575 SsTV1 and SsTV2. As part of an iterative approach, contig sequences were compared against  
576 viral sequences detected from parasite datasets, including newly detected *S. solidus* viruses,  
577 leading to the detection of a novel bunya-like virus and a third toti-like virus, named SsBV and  
578 SsTV3, respectively.

### 579 ***Viral genome completion***

580 Quality filtered reads and contig sequences associated with each of the viruses were retrieved by  
581 comparing sequences through BLASTn to a database containing newly identified contig  
582 sequences, including those from the original assembly done in Trinity, and closely-related  
583 sequences. All reads and contigs were re-assembled using the default overlap-consensus  
584 algorithm implemented in Geneious version R7. All assemblies resulted in near-complete  
585 genome sequences represented by a single contig, with the exception of SsRV for which genome  
586 gaps were closed through targeted PCR (primers listed on Table S1). To complete genomes,  
587 RNA samples from families originally pooled by lake were screened for each of the viruses to  
588 identify positive samples. Positive samples were then used for PCR and rapid amplification of  
589 complimentary ends (RACE) assays (77). All PCRs were performed using the AmpliTaq Gold™  
590 360 Master Mix with GC enhancer (Thermo Fisher Scientific). PCR using primers designed off  
591 of the SsJV contig sequence ends confirmed the circular topology of this new chuvirus-like  
592 genome (Table S1). The genome ends of the remaining viral sequences were completed through  
593 RACE (primers provided in Table S2). Prior to 3'RACE reactions, RNA extracts were denatured  
594 at 95°C for 6 minutes and placed on ice immediately to prevent RNA reannealing (78).  
595 Denatured RNA was used as template for poly(A) tail reactions using a Poly(A) Polymerase  
596 from *E. coli*, which synthesizes poly(A) tails at the 3' termini of ssRNA templates. Poly(A)  
597 reactions contained 1mM ATP, 1X poly(A) polymerase buffer, 0.25 U poly(A) polymerase (New  
598 England Biolabs) and 15 ul of RNA. Poly(A)-tailed RNAs were used as template for 3'RACE  
599 reactions. The 5' ends were completed with the 5'RACE system. All RACE products were  
600 cloned using the CloneJET PCR Cloning Kit (Thermo Fisher Scientific) and Sanger sequenced

601 using vector primers. All PCR and cloned RACE products were commercially sequenced by  
602 TACGen.

### 603 ***Egg hatching for experimental infections and diagnostic PCR assays***

604 *S. solidus* eggs were hatched following a similar strategy as that outlined above. Briefly, eggs were  
605 allowed to develop in sterile filtered tap water for 3 weeks at 18°C in the dark. Hatching was  
606 stimulated by exposing eggs to light for one hour in the evening before use, and for three hours  
607 the next morning (79). To test for virus presence in each family, newly hatched coracidia were  
608 collected via centrifugation before RNA extraction.

### 609 ***Experimental infections of copepods***

610 The first intermediate host, *Macrocyclus albidus* copepods were cultured in the laboratory at  
611 20°C and 16:8 light:dark cycle. We used a population of copepods originating from lake  
612 Skogseidsvatnet, Norway that is highly susceptible to *S. solidus* (80). C5 copepodite stage were  
613 exposed to one coracidium each as previously described (80). Briefly, individual copepods were  
614 kept in wells of 24-well microtiter plates and starved for 2 days before exposure to a single newly  
615 hatched coracidia. Fourteen days post exposure, copepods exposed to *S. solidus* were screened  
616 under the microscope to determine the infection success. To test for the rate of vertical  
617 transmission, infected and non-infected copepods were then rinsed in sterile water, and isolated  
618 via centrifugation before RNA extraction. As controls, individual copepods that were not exposed  
619 to the parasites were collected and had their RNA extracted. To control for potential contamination  
620 by *S. solidus* in exposed but not infected copepods, we conducted PCRs with *S. solidus* specific  
621 primers according to Berger et al (81).

### 622 ***Sampling and experimental infection of threespine sticklebacks***

623 In June 2018, we also collected mature males and gravid females of the second intermediate host  
624 *Gasterosteus aculeatus* from Rabbit slough (61° 32' 08.1" N 149° 15' 10.0" W), Cheney Lake, and  
625 Loberg lake and completed crosses *in vitro* to obtain lab-bred families. Fish were reared in the  
626 laboratory at 18°C and 16:8 light:dark cycle until they were 5-months old and ready for  
627 experimental exposure to *S. solidus*. Fish were fed a diet of frozen brine shrimps and chironomids  
628 larvae ad libitum daily. Each of the 224 fish were exposed to copepods parasitized with a single *S.*  
629 *solidus* infected with SsRV, SsJV, or neither virus. Exposure was performed by placing a single  
630 infected copepod in a tank containing a single fish that had been starved for 48h. Two days later,

631 fish were transferred back into large tanks. After eight weeks, fish were dissected and from the  
632 five that were infected, plerocercoids, fish body cavity, liver and intestine were collected and  
633 stored in RNA later until use.

#### 634 ***PCR assays for assessing viral prevalence and transmission***

635 Specimens collected at different stages of *S. solidus* life cycle were used to assess virus prevalence,  
636 vertical transmission, and cross-species transmission to parasitized hosts. To do this, total RNA  
637 was extracted from *S. solidus* plerocercoids, culture medium used for breeding, coracidia,  
638 copepods, and stickleback tissues using the RNeasy kit (Qiagen CAT#74106) following the  
639 manufacturer's guidelines (Qiagen CAT#74106). First strand cDNA was synthesized by reverse  
640 transcribing 500 ng of total RNA and mixed with 0.2 µg/µl Random Hexamer Primer in a 20 µl  
641 reaction volume containing 40 U/µl Ribolock™ RNase Inhibitor, 1 mM dNTPs, 200 U/µl  
642 RevertAid H Minus Reverse Transcriptase (Thermo Fisher Scientific CAT# EP0451), and water,  
643 as per manufacturer's recommendations. Polymerase chain reaction was conducted using the  
644 Advantage 2 PCR system (Invitrogen CAT# 639137) using primers targeting the conserved RNA-  
645 dependent RNA polymerase gene of *S. solidus* associated viruses (Table S1). Amplicon presence  
646 was assayed with 1% agarose gel with SyBR Safe. Select PCR products were sequenced using  
647 Sanger sequencing to confirm primers' specificity.

#### 648 **Data mining**

649 To assess virus presence in other populations of *S. solidus*, we queried BioProjects of publicly  
650 available transcriptomes. At the time of this study, we found PRJEB7355  
651 (<https://www.ncbi.nlm.nih.gov/bioproject/316954>, 2 biosamples of wild-caught Norwegian and  
652 German *S. solidus*) which used 454 sequencing to identify plerocercoids virulence genes. BLASTn  
653 searches were used to determine the presence of 454 reads that aligned to the newly identified  
654 viruses in data from PRJEB7355. A more recent and comprehensive study, PRJNA304161 (15  
655 biosamples from Clatworthy reservoir, England, UK) used Illumina HiSeq to compare the  
656 transcriptomes of plerocercoids collected either 70 days, 110 days or 365 days post infection of  
657 threespine sticklebacks, thus representing non-infective and infective plerocercoids, and adult  
658 stages of *S. solidus* (35). Sequence data from PRJNA304161 were downloaded and processed as  
659 follows: reads were trimmed with the Trimmomatic version 0.36 (74) with default settings. Quality  
660 filtered reads were aligned against the *S. solidus* reference genome (GCA\_900618435.1) with

661 Bowtie2 (version 2.3.4.1) (71). Unmapped reads were collected using SAMtools 1.8 (82) and  
662 bedtools (83) and assembled using the shovill method (<https://github.com/tseemann/shovill> ). The  
663 contig sequences were compared against the GenBank non-redundant database and *S. solidus*  
664 newly discovered viruses through BLASTx. To test for virus presence in all individuals and  
665 provide relative quantitation, clean reads were aligned on assembled viruses using BWA (version  
666 0.7.8) (84).

#### 667 **Ethics statement**

668 Stickleback collection followed guidelines for scientific fish collection by the State of Alaska  
669 Department of Fish and Game in accordance with Fish sampling permit #P17-025 and #P-18-008  
670 and fish transport permits 17A-0024 provided to NMD. Fish were maintained at Stony Brook  
671 University under the License to collect or possess #1949 provided by the New York State  
672 Department of Environmental Conservation to NMD. Fish experiments were conducted following  
673 protocols described in Institutional Animal Care and Use Committee (IACUC) #237429 and #  
674 815164 to Michael Bell and NMD, respectively. Fish euthanasia was conducted using MS222 and  
675 decapitation before parasite and tissue sampling. All experiments were performed in accordance  
676 with relevant guidelines and regulations in the Public Health Service Policy (PHS) on Humane  
677 Care and Use of Laboratory Animals.

#### 678 **Data availability**

679 Sequencing data were submitted to NCBI Sequence Read Archives under Bioproject accession  
680 number PRJNA576618.

#### 681 **Acknowledgments**

682 We would like to acknowledge the expertise and assistance of Dr. Michael Bell in fish collection  
683 and dissection techniques. This project was supported by the Eppley Foundation for Research and  
684 the Laurie Landeau Foundation LLC.

685

686 References

---

- 687 1. **Anonymous.** 2019. Global Health Observatory Data. World Health Organization.
- 688 2. **Hotez PJ, Fenwick A.** 2009. Schistosomiasis in Africa: an emerging tragedy in our new  
689 global health decade. Public Library of Science.
- 690 3. **Van Tong H, Brindley PJ, Meyer CG, Velavan TP.** 2017. Parasite infection,  
691 carcinogenesis and human malignancy. *EBioMedicine* **15**:12-23.
- 692 4. **Anonymous.** 2012. Biological agents. Volume 100 B. A review of human carcinogens.  
693 IARC Monogr Eval Carcinog Risks Hum **100**:1-441.
- 694 5. **Anonymous.** 1994. Schistosomes, liver flukes and *Helicobacter pylori*. IARC Working  
695 Group on the Evaluation of Carcinogenic Risks to Humans. Lyon, 7-14 June 1994. IARC  
696 Monogr Eval Carcinog Risks Hum **61**:1-241.
- 697 6. **Anonymous.** 2017. Foodborne trematode infections: Fascioliasis. World Health  
698 Organization.
- 699 7. **Clery D, Torgerson P, Mulcahy G.** 1996. Immune responses of chronically infected  
700 adult cattle to *Fasciola hepatica*. *Veterinary parasitology* **62**:71-82.
- 701 8. **Mage C, Bourgne H, Toullieu J-M, Rondelaud D, Dreyfuss G.** 2002. *Fasciola*  
702 *hepatica* and *Paramphistomum daubneyi*: changes in prevalences of natural infections in  
703 cattle and in *Lymnaea truncatula* from central France over the past 12 years. *Veterinary*  
704 *research* **33**:439-447.
- 705 9. **Cobo F.** 2014. 11 - Taeniasis and neurocysticercosis, p 155-166. In Cobo F (ed),  
706 Imported Infectious Diseases doi:<https://doi.org/10.1533/9781908818737.155>. Woodhead  
707 Publishing.
- 708 10. **CDC.** 2017. Hymenolepiasis.
- 709 11. **CDC.** 2012. Parasites- Echinococcosis.
- 710 12. **Abdussalam M, Käferstein F, Mott K.** 1995. Food safety measures for the control of  
711 foodborne trematode infections. *Food Control* **6**:71-79.
- 712 13. **Budke CM, White Jr AC, Garcia HH.** 2009. Zoonotic larval cestode infections:  
713 neglected, neglected tropical diseases? *PLoS neglected tropical diseases* **3**:e319.
- 714 14. **Chai J-Y.** 2013. Praziquantel treatment in trematode and cestode infections: an update.  
715 *Infection & chemotherapy* **45**:32-43.
- 716 15. **Hahn MA, Dheilly NM.** 2016. Experimental Models to Study the Role of Microbes in  
717 Host-Parasite Interactions. *Frontiers in Microbiology* **7**.
- 718 16. **Dheilly NM.** 2014. Holobiont–Holobiont interactions: redefining host–parasite  
719 interactions. *PLoS Pathog* **10**:e1004093.
- 720 17. **Dheilly NM, Poulin R, Thomas F.** 2015. Biological warfare: Microorganisms as drivers  
721 of host–parasite interactions. *Infect Genet Evol* **34**:251-259.
- 722 18. **Dheilly NM, Martinez JM, Rosario K, Brindley PJ, Fichorova RN, Kaye JZ, Kohl**  
723 **KD, Knoll LJ, Lukes J, Perkins SL, Poulin R, Schriml L, Thompson LR.** 2019.  
724 Parasite microbiome project: Grand challenges *PLoS pathogens* **15**.
- 725 19. **Dheilly NM, Bolnick D, Bordenstein S, Brindley PJ, Figuères C, Holmes EC,**  
726 **Martínez JM, Phillips AJ, Poulin R, Rosario K.** 2017. Parasite Microbiome Project:  
727 Systematic Investigation of Microbiome Dynamics within and across Parasite-Host  
728 Interactions. *mSystems* **2**:e00050-00017.



- 729 20. **Noury-Shaïri N, Justine J-L, Bonami J-R.** 1995. Viral particles in a flatworm  
730 (Paravortex tapetis) parasitic in the commercial clam, *Ruditapes decussatus*. Journal of  
731 invertebrate pathology **65**:200-202.
- 732 21. **Justine J-L, Bonami J-R.** 1993. Virus-like particles in a monogenean (Platyhelminthes)  
733 parasitic in a marine fish. International journal for parasitology **23**:69-75.
- 734 22. **Shi M, Lin X-D, Tian J-H, Chen L-J, Chen X, Li C-X, Qin X-C, Li J, Cao J-P, Eden  
735 J-S, Buchmann J, Wang W, Xu J, Holmes EC, Zhang Y-Z.** 2016. Redefining the  
736 invertebrate RNA virosphere. Nature **540**:539-543.
- 737 23. **Bråten T.** 1966. Host specificity in *Schistocephalus solidus*. Parasitology **56**:657-664.
- 738 24. **Clarke A.** Studies on the life cycle of the pseudophyllidean cestode *Schistocephalus*  
739 *solidus*, p 257-302. In (ed), Wiley Online Library,
- 740 25. **Smyth JD.** 1990. In vitro cultivation of parasitic helminths. CRC press.
- 741 26. **Wedekind C.** 1997. The infectivity, growth, and virulence of the cestode  
742 *Schistocephalus solidus* in its first intermediate host, the copepod *Macrocyclus albidus*.  
743 Parasitology **115**:317-324.
- 744 27. **Weber JN, Kalbe M, Shim KC, Erin NI, Steinel NC, Ma L, Bolnick DI.** 2017. Resist  
745 globally, infect locally: a transcontinental test of adaptation by stickleback and their  
746 tapeworm parasite. The American Naturalist **189**:43-57.
- 747 28. **Barber I.** 2007. Host-parasite interactions of the three-spined stickleback. Biology of the  
748 Three-spined Stickleback:271-317.
- 749 29. **Barber I, Scharsack J.** 2010. The three-spined stickleback-*Schistocephalus solidus*  
750 system: an experimental model for investigating host-parasite interactions in fish.  
751 Parasitology **137**:411-424.
- 752 30. **Kingsley D.** 2003. Sequencing the genome of threespine sticklebacks (*Gasterosteus*  
753 *aculeatus*). National Human Genome Research Institute White Paper.
- 754 31. **ParaSite W.** 2015. *Schistocephalus solidus* genome assembly. WormBase database.
- 755 32. **Botvinkin AD, Poleschuk EM, Kuzmin IV, Borisova TI, Gazaryan SV, Yager P,  
756 Rupprecht CE.** 2003. Novel lyssaviruses isolated from bats in Russia. Emerging  
757 infectious diseases **9**:1623.
- 758 33. **Bodewes R, Ruiz-Gonzalez A, Schürch AC, Osterhaus AD, Smits SL.** 2014. Novel  
759 divergent rhabdovirus in feces of red fox, Spain. Emerging infectious diseases **20**:2172.
- 760 34. **Hebert FO, Phelps L, Samonte I, Panchal M, Grambauer S, Barber I, Kalbe M,  
761 Landry CR, Aubin-Horth N.** 2015. Identification of candidate mimicry proteins  
762 involved in parasite-driven phenotypic changes. Parasites & vectors **8**:225.
- 763 35. **Hébert FO, Grambauer S, Barber I, Landry CR, Aubin-Horth N.** 2016.  
764 Transcriptome sequences spanning key developmental states as a resource for the study  
765 of the cestode *Schistocephalus solidus*, a threespine stickleback parasite. GigaScience  
766 **5**:24.
- 767 36. **Sprehn CG, Blum MJ, Quinn TP, Heins DC.** 2015. Landscape genetics of  
768 *Schistocephalus solidus* parasites in threespine stickleback (*Gasterosteus aculeatus*) from  
769 Alaska. PLoS One **10**:e0122307.
- 770 37. **Bell MA, Foster SA.** 1994. The evolutionary biology of the threespine stickleback.  
771 Oxford University Press.
- 772 38. **Wootton RJ.** 1976. Biology of the sticklebacks. Academic Press.
- 773 39. **Kennedy C.** 1974. A checklist of British and Irish freshwater fish parasites with notes on  
774 their distribution. Journal of Fish Biology **6**:613-644.

- 775 40. **Lefkowitz EJ, Dempsey DM, Hendrickson RC, Orton RJ, Siddell SG, Smith DB.**  
776 2017. Virus taxonomy: the database of the International Committee on Taxonomy of  
777 Viruses (ICTV). *Nucleic Acids Research* **46**:D708-D717.
- 778 41. **Li C-X, Shi M, Tian J-H, Lin X-D, Kang Y-J, Chen L-J, Qin X-C, Xu J, Holmes EC,**  
779 **Zhang Y-Z.** 2015. Unprecedented genomic diversity of RNA viruses in arthropods  
780 reveals the ancestry of negative-sense RNA viruses. *elife* **4**:e05378.
- 781 42. **Schreur PJW, Kormelink R, Kortekaas J.** 2018. Genome packaging of the  
782 Bunyavirales. *Current opinion in virology* **33**:151-155.
- 783 43. **Ryu W-S.** 2016. Molecular virology of human pathogenic viruses. Academic Press.
- 784 44. **Kuzmin I, Novella I, Dietzgen R, Padhi A, Rupprecht C.** 2009. The rhabdoviruses:  
785 biodiversity, phylogenetics, and evolution. *Infection, Genetics and Evolution* **9**:541-553.
- 786 45. **Amarasinghe GK, Ayllón MA, Bào Y, Basler CF, Bavari S, Blasdel KR, Briese T,**  
787 **Brown PA, Bukreyev A, Balkema-Buschmann A.** 2019. Taxonomy of the order  
788 Mononegavirales: update 2019. *Archives of virology* **164**:1967-1980.
- 789 46. **King AM, Lefkowitz E, Adams MJ, Carstens EB.** 2011. Virus taxonomy: ninth report  
790 of the International Committee on Taxonomy of Viruses, vol 9. Elsevier.
- 791 47. **Longdon B, Hadfield JD, Day JP, Smith SC, McGonigle JE, Cogni R, Cao C, Jiggins**  
792 **FM.** 2015. The causes and consequences of changes in virulence following pathogen host  
793 shifts. *PLoS pathogens* **11**:e1004728.
- 794 48. **Parratt SR, Laine A-L.** 2016. The role of hyperparasitism in microbial pathogen  
795 ecology and evolution. *The ISME journal* **10**:1815.
- 796 49. **Cressler CE, McLEOD DV, Rozins C, Van Den Hoogen J, Day T.** 2016. The adaptive  
797 evolution of virulence: a review of theoretical predictions and empirical tests.  
798 *Parasitology* **143**:915-930.
- 799 50. **Smyth J.** 1946. Studies on tapeworm physiology: I. The cultivation of *Schistocephalus*  
800 *solidus* in vitro. *Journal of Experimental Biology* **23**:47-70.
- 801 51. **Mullen GR, Durden LA.** 2009. Medical and veterinary entomology. Academic press.
- 802 52. **Kurtz J, Wegner KM, Kalbe M, Reusch TB, Schaschl H, Hasselquist D, Milinski M.**  
803 2006. MHC genes and oxidative stress in sticklebacks: an immuno-ecological approach.  
804 *Proceedings of the Royal Society B: Biological Sciences* **273**:1407-1414.
- 805 53. **Leder EH, Merilä J, Primmer CR.** 2009. A flexible whole-genome microarray for  
806 transcriptomics in three-spine stickleback (*Gasterosteus aculeatus*). *BMC genomics*  
807 **10**:426.
- 808 54. **Huntingford F, Chellappa S, Taylor A, Strang R.** 2001. Energy reserves and  
809 reproductive investment in male three-spined sticklebacks, *Gasterosteus aculeatus*.  
810 *Ecology of Freshwater Fish* **10**:111-117.
- 811 55. **Haase D, Rieger JK, Witten A, Stoll M, Bornberg-Bauer E, Kalbe M, Schmidt-**  
812 **Drewello A, Scharsack JP, Reusch TB.** 2016. Comparative transcriptomics of  
813 stickleback immune gene responses upon infection by two helminth parasites,  
814 *Diplostomum pseudospathaceum* and *Schistocephalus solidus*. *Zoology* **119**:307-313.
- 815 56. **Ritter M, Kalbe M, Henrich T.** 2017. Virulence in the three-spined stickleback specific  
816 parasite *Schistocephalus solidus* is inherited additively. *Experimental parasitology*  
817 **180**:133-140.
- 818 57. **Scharsack J, Kalbe M, Derner R, Kurtz J, Milinski M.** 2004. Modulation of  
819 granulocyte responses in three-spined sticklebacks *Gasterosteus aculeatus* infected with  
820 the tapeworm *Schistocephalus solidus*. *Diseases of aquatic organisms* **59**:141-150.



- 821 58. **Scharsack JP, Koch K, Hammerschmidt K.** 2007. Who is in control of the stickleback  
822 immune system: interactions between *Schistocephalus solidus* and its specific vertebrate  
823 host. *Proceedings of the Royal Society B: Biological Sciences* **274**:3151-3158.
- 824 59. **Grybchuk D, Akopyants NS, Kostygov AY, Konovalovas A, Lye L-F, Dobson DE,**  
825 **Zangger H, Fasel N, Butenko A, Frolov AO.** 2018. Viral discovery and diversity in  
826 trypanosomatid protozoa with a focus on relatives of the human parasite *Leishmania*.  
827 *Proceedings of the National Academy of Sciences* **115**:E506-E515.
- 828 60. **Fischer K, dos Reis VP, Finke S, Sauerhering L, Stroh E, Karger A, Maisner A,**  
829 **Groschup MH, Diederich S, Balkema-Buschmann A.** 2016. Expression,  
830 characterisation and antigenicity of a truncated Hendra virus attachment protein  
831 expressed in the protozoan host *Leishmania tarentolae*. *Journal of virological methods*  
832 **228**:48-54.
- 833 61. **Parent KN, Takagi Y, Cardone G, Olson NH, Ericsson M, Yang M, Lee Y, Asara**  
834 **JM, Fichorova RN, Baker TS.** 2013. Structure of a protozoan virus from the human  
835 genitourinary parasite *Trichomonas vaginalis*. *MBio* **4**:e00056-00013.
- 836 62. **Wang AL, Yang H-M, Shen KA, Wang CC.** 1993. Giardavirus double-stranded RNA  
837 genome encodes a capsid polypeptide and a gag-pol-like fusion protein by a translation  
838 frameshift. *Proceedings of the National Academy of Sciences* **90**:8595-8599.
- 839 63. **Gomez-Arreaza A, Haenni A-L, Dunia I, Avilan L.** 2017. Viruses of parasites as actors  
840 in the parasite-host relationship: A “ménage à trois”. *Acta tropica* **166**:126-132.
- 841 64. **Fichorova RN, Lee Y, Yamamoto HS, Takagi Y, Hayes GR, Goodman RP, Chepa-**  
842 **Lotrea X, Buck OR, Murray R, Kula T.** 2012. Endobiont viruses sensed by the human  
843 host—beyond conventional antiparasitic therapy. *PLoS ONE* **7**:e48418.
- 844 65. **Bourreau E, Ginouves M, Prévot G, Hartley M-A, Gangneux J-P, Robert-Gangneux**  
845 **F, Dufour J, Sainte-Marie D, Bertolotti A, Pratlong F.** 2015. Presence of *Leishmania*  
846 RNA virus 1 in *Leishmania guyanensis* increases the risk of first-line treatment failure  
847 and symptomatic relapse. *The Journal of infectious diseases* **213**:105-111.
- 848 66. **Mabbott NA.** 2018. The influence of parasite infections on host immunity to co-infection  
849 with other pathogens. *Frontiers in immunology* **9**:2579.
- 850 67. **Shen S-S, Qu X-Y, Zhang W-Z, Li J, Lv Z-Y.** 2019. Infection against infection:  
851 parasite antagonism against parasites, viruses and bacteria. *Infectious diseases of poverty*  
852 **8**:49.
- 853 68. **Castiglioni P, Hartley M-A, Rossi M, Prevel F, Desponds C, Utschneider DT, Eren**  
854 **R-O, Zangger H, Brunner L, Collin N.** 2017. Exacerbated leishmaniasis caused by a  
855 viral endosymbiont can be prevented by immunization with its viral capsid. *PLoS*  
856 *neglected tropical diseases* **11**:e0005240.
- 857 69. **Ng TFF, Manire C, Borrowman K, Langer T, Ehrhart L, Breitbart M.** 2009.  
858 Discovery of a novel single-stranded DNA virus from a sea turtle fibropapilloma by  
859 using viral metagenomics. *Journal of Virology* **83**:2500-2509.
- 860 70. **Ng TFF, Suedmeyer WK, Wheeler E, Gulland F, Breitbart M.** 2009. Novel  
861 anellovirus discovered from a mortality event of captive California sea lions. *Journal of*  
862 *General Virology* **90**:1256-1261.
- 863 71. **Langmead B, Salzberg SL.** 2012. Fast gapped-read alignment with Bowtie 2. *Nature*  
864 *methods* **9**:357.
- 865 72. **Andrews S.** 2010. FastQC: a quality control tool for high throughput sequence data.  
866 Babraham Bioinformatics, Babraham Institute, Cambridge, United Kingdom.

- 867 73. **Lüscher A, Milinski M.** 2003. Simultaneous hermaphrodites reproducing in pairs self-  
868 fertilize some of their eggs: an experimental test of predictions of mixed-mating and  
869 Hermaphrodite's Dilemma theory. *Journal of Evolutionary Biology* **16**:1030-1037.
- 870 74. **Bolger AM, Lohse M, Usadel B.** 2014. Trimmomatic: a flexible trimmer for Illumina  
871 sequence data. *Bioinformatics* **30**:2114-2120.
- 872 75. **Roux S, Trubl G, Goudeau D, Nath N, Couradeau E, Ahlgren NA, Zhan Y, Marsan  
873 D, Chen F, Fuhrman JA.** 2019. Optimizing de novo genome assembly from PCR-  
874 amplified metagenomes. *PeerJ* **7**:e6902.
- 875 76. **Bankevich A, Nurk S, Antipov D, Gurevich AA, Dvorkin M, Kulikov AS, Lesin VM,  
876 Nikolenko SI, Pham S, Prjibelski AD.** 2012. SPAdes: a new genome assembly  
877 algorithm and its applications to single-cell sequencing. *Journal of computational biology*  
878 **19**:455-477.
- 879 77. **Scotto-Lavino E, Du G, Frohman MA.** 2006. 5' end cDNA amplification using classic  
880 RACE. *Nature protocols* **1**:2555.
- 881 78. **Ahmadi E, Soleimanjahi H, Sadeghizadeh M, Teimoori A.** 2016. Development of  
882 Poly (A)-Tailed Universal Reverse Transcription PCR Method for Sequence-Independent  
883 Amplification of Rearranged Rotavirus. *Archives of Iranian Medicine (AIM)* **19**.
- 884 79. **Dubinina MN.** 1966. Ligulidae (Cestoda) of the USSR. *Ligulidae (Cestoda) of the  
885 USSR*.
- 886 80. **Van der Veen I, Kurtz J.** 2002. To avoid or eliminate: cestode infections in copepods.  
887 *Parasitology* **124**:465-474.
- 888 81. **Berger CS, Aubin-Horth N.** 2018. An eDNA-qPCR assay to detect the presence of the  
889 parasite *Schistocephalus solidus* inside its threespine stickleback host. *Journal of  
890 Experimental Biology* **221**:jeb178137.
- 891 82. **Li H, Handsaker B, Wysoker A, Fennell T, Ruan J, Homer N, Marth G, Abecasis G,  
892 Durbin R.** Genome Project Data Processing Subgroup. 2009. The Sequence  
893 alignment/map (SAM) format and SAMtools. *Bioinformatics* **1000**:16.
- 894 83. **Quinlan AR, Hall IM.** 2010. BEDTools: a flexible suite of utilities for comparing  
895 genomic features. *Bioinformatics* **26**:841-842.
- 896 84. **Li H.** 2013. Aligning sequence reads, clone sequences and assembly contigs with BWA-  
897 MEM. arXiv preprint arXiv:13033997.

898
